# Supplementary material for: A Low to Medium-Shear Extruded Kibble with Greater Resistant Starch Increased Fecal Oligosaccharides, Butyric Acid, and Other Saccharolytic Fermentation By-Products in Dogs
Source: MDPI journal article supplement (doi:10.3390/microorganisms9112293), 2021-11-04
Supplement: s1 [file s1]

### Supplementary material

**Table S1.** Nutritional Composition of Equal Recipe Foods Extruded at High (HS), Medium (MS) and Low (LS) Shear.

| Nutrient                       | HS    | MS     | LS     |
|--------------------------------|-------|--------|--------|
| Moisture, %                    | 8.69  | 9.87   | 10.40  |
| Dry Matter, %                  | 91.31 | 90.13  | 89.6   |
| Organic Matter, %              | 86.03 | 85.15  | 84.1   |
| Energy, kcal/kg                | 4652  | 4630   | 4541   |
| Ash, %                         | 5.28  | 4.98   | 5.50   |
| Crude Protein, %               | 19.5  | 19.06  | 19.94  |
| Fat Crude, %                   | 15.04 | 14.94  | 14.28  |
| Total Fatty Acids, %           | 13.95 | 13.75  | 13.08  |
| Monounsaturated Fatty Acids, % | 5.86  | 5.77   | 5.53   |
| Polyunsaturated Fatty Acids, % | 3.17  | 3.17   | 3.00   |
| Saturated Fatty Acids, %       | 4.91  | 4.81   | 4.55   |
| Total Fat as Triglycerides, %  | 14.60 | 14.38  | 13.68  |
| Fiber Crude, %                 | 1.30  | 1.2    | 1.10   |
| Fiber Total Dietary, %         | 6.2   | 5.8    | 6.7    |
| Fiber Insoluble, %             | 6.1   | 5.8    | 6.1    |
| Fiber Soluble, %               | < 0.2 | < 0.2  | 0.6    |
| Sucrose                        | 1.03  | 1.07   | 0.83   |
| Sugars - Total                 | 1.67  | 1.07   | 0.83   |
| Fructose                       | 0.19  | < 0.15 | <0.15  |
| Glucose                        | 0.28  | < 0.15 | < 0.15 |
| Lactose                        | 0.17  | < 0.15 | <0.15  |
| Maltose                        | <0.15 | < 0.15 | < 0.15 |
| Starch                         | 41.7  | 41.6   | 39.2   |
| Resistant starch, %            | 0.650 | 0.940  | 1.057  |
| Amino acids                    |       |        |        |
| Alanine, %                     | 1.40  | 1.36   | 1.41   |
| Arginine, %                    | 1.13  | 1.07   | 1.14   |
| Aspartic Acid, %               | 1.50  | 1.46   | 1.56   |
| Glutamic Acid, %               | 2.85  | 2.76   | 2.92   |
| Glycine, %                     | 1.66  | 1.59   | 1.71   |
| Histidine, %                   | 0.46  | 0.44   | 0.47   |
| Isoleucine, %                  | 0.70  | 0.68   | 0.70   |
| Leucine, %                     | 1.63  | 1.6    | 1.59   |
| Lysine, %                      | 1.17  | 1.13   | 1.24   |
| Phenylalanine, %               | 0.82  | 0.8    | 0.79   |
| Proline, %                     | 1.49  | 1.4    | 1.39   |
| Serine, %                      | 0.77  | 0.75   | 0.80   |
| Threonine, %                   | 0.70  | 0.68   | 0.74   |
| Tyrosine, %                    | 0.42  | 0.4    | 0.37   |

|                                              |         |        |         |
|----------------------------------------------|---------|--------|---------|
| Valine, %                                    | 0.89    | 0.84   | 0.88    |
| Cystine, %                                   | 0.19    | 0.2    | 0.19    |
| Methionine, %                                | 0.37    | 0.38   | 0.39    |
| Tryptophan, %                                | 0.17    | 0.17   | 0.18    |
| Taurine, %                                   | 0.10    | 0.11   | 0.10    |
| Hydroxyproline, %                            | 0.52    | 0.46   | 0.50    |
| Minerals                                     |         |        |         |
| Chloride, %                                  | 0.42    | 0.42   | 0.45    |
| Calcium, %                                   | 1.160   | 1.11   | 1.230   |
| Magnesium, %                                 | 0.098   | 0.095  | 0.098   |
| Phosphorus, %                                | 0.86    | 0.84   | 0.90    |
| Potassium, %                                 | 0.59    | 0.57   | 0.61    |
| Sodium, %                                    | 0.173   | 0.175  | 0.188   |
| Protein Crude, %                             | 19.50   | 19.06  | 19.94   |
| Sulfur, %                                    | .22     | 0.22   | .23     |
| Chromium, ppm                                | 0.26    | 0.33   | 0.24    |
| Copper, ppm                                  | 17      | 17     | 19      |
| Iron, %                                      | 0.0178  | 0.0177 | 0.0189  |
| Manganese, ppm                               | 19      | 20     | 20      |
| Zinc, ppm                                    | 309.000 | 309    | 340.000 |
| Molybdenum, ppm                              | 0.25    | 0.3    | 0.23    |
| Selenium, ppm                                | 0.68    | 0.66   | 0.70    |
| Aluminum, ppm                                | < 10.0  | < 10.0 | < 10.0  |
| Cobalt, ppm                                  | < 0.75  | < 0.75 | < 0.75  |
| Nitrate, mg / kg                             | < 10    | < 10   | < 10    |
| Vitamins                                     |         |        |         |
| Vitamin A, IU / 100 g                        | 381.0   | 485    | 416.0   |
| Vitamin B7 - Biotin, mg / 100 g              | 0.03    | 0.03   | 0.03    |
| Choline, mg / 100 g                          | 182     | 179    | 181     |
| Vitamin B3 - Niacin, mg / 100 g              | 6.510   | 6.77   | 5.930   |
| Vitamin B5 - Pantothenic Acid, mg / 100 g    | 1.240   | 1.15   | 1.200   |
| Vitamin B9 - Folic Acid, mg / 100 g          | 0.141   | 0.117  | 0.108   |
| Vitamin A - Beta Carotene, IU / 100 g        | 46.500  | 46.4   | 86.900  |
| Vitamin A - Retinol, IU / 100 g              | 334.000 | 439    | 329.000 |
| Vitamin B1 Mononitrate, mg / 100 g           | 2.81    | 2.61   | 2.73    |
| Vitamin B1 Thiamin Base, mg / 100 g          | 2.58    | 2.4    | 2.51    |
| Vitamin B1-ThiamineHydrochloride, mg / 100 g | 2.89    | 2.69   | 2.81    |
| Vitamin B12 - Cobalamin, µg / 100 g          | 6.51    | 5.7    | 3.73    |
| Vitamin B2 - Riboflavin, mg / 100 g          | .62     | 0.619  | .578    |
| Vitamin B6 - Pyridoxine, mg / 100 g          | 0.8     | 0.8    | 0.9     |

**Table S2.** Analytical Methods of each Nutrient Analyzed in Equal Recipe Foods produced at High (HS), Medium (MS) and Low (LS) Shear, as well as Fecal Samples of Dogs Fed These Diets.

| Analysis                                  | Method                                                                                    |
|-------------------------------------------|-------------------------------------------------------------------------------------------|
| Acid Detergent Fiber QD002-Eurofins       | ANKOM ADF for A2000 mod - Gravimetry                                                      |
| Aluminum by ICP                           | AOAC 984.27 mod,927.02 mod,985.01 mod,965.17 mod                                          |
| Amino Acids Excluding Tryptophan          | AOAC 982.30 mod.                                                                          |
| Ash                                       | AOAC 942.05                                                                               |
| Biotin                                    | Met. of Vitamin Assay,Interscience Publ.,Ch.12 - Nephelometry                             |
| Calories                                  | Calorimetry                                                                               |
| Chloride Soluble by Chloridometer         | AOAC 2016.03, AOAC 971.27                                                                 |
| Choline Total by Ion Chromatography       | AOAC 2012.20 mod.                                                                         |
| Chromium by ICP-MS - QD0K2                | AOAC 2011.19 mod.                                                                         |
| Cobalt by AAS                             | AOAC 965.17 / 968.08 modified                                                             |
| Cystine & Methionine                      | AOAC 994.12 mod.                                                                          |
| Fat Crude by Acid Hydrolysis              | AOAC 954.02                                                                               |
| Fatty Acids-Omega 6 & 3 %W/W              | AOCS Ce 2-66 mod., AOCS Ce 1b-89 mod.                                                     |
| Fiber Crude                               | AOAC 962.09; AOCS Ba 6-84                                                                 |
| Fiber Dietary Complete                    | AOAC 991.43                                                                               |
| Fiber Neutral Detergent                   | ANKOM NDF for A2000 mod. - Gravimetry                                                     |
| Fluoride                                  | AOAC 975.08                                                                               |
| Hydroxyproline - AOAC                     | AOAC 982.30 mod.                                                                          |
| Macro Elements by ICP                     | AOAC 984.27 mod,927.02 mod,985.01 mod,965.17 mod                                          |
| Minor Elements by ICP                     | AOAC 984.27 mod,927.02 mod,985.01 mod,965.17 mod                                          |
| Moisture - Forced Draft Oven              | AOAC 930.15                                                                               |
| Molybdenum by ICP-MS - QD0K1              | AOAC 2011.19 mod.                                                                         |
| Niacin or Niacinamide - AOAC              | AOAC 944.13 mod.                                                                          |
| Nitrate by IC                             | Internal Method based on EN 12014-2, (QA02F) J. AOAC Int., 2005, 88(6), 1793-1796 - IC-EC |
| Nitrite as Nitrogen - AOAC 968.07         | AOAC 968.07                                                                               |
| Pantothenic Acid - AOAC                   | AOAC 945.74 (mod.)                                                                        |
| Protein by Kjeltex (Kjeldahl Replacement) | AOAC 2001.11                                                                              |
| Selenium by ICP-MS - QD0K0                | AOAC 2011.19 mod.                                                                         |
| Starch Total - AOAC                       | AOAC 996.11                                                                               |
| Sugar Profile by HPLC - AOAC              | AOAC 982.14, mod.                                                                         |
| Sulfate - AOAC Gravimetric                | AOAC 920.46                                                                               |
| Sulfur by ICP                             | Internal Method - MET3289 - ICP-OES                                                       |
| Taurine Food                              | AOAC 982.30 mod.                                                                          |
| Total Folate as Folic Acid                | AOAC 992.05 mod.                                                                          |
| Tryptophan - AOAC                         | AOAC 988.15 mod.                                                                          |
| Vitamin A Total-AOAC                      | AOAC 974.29 Mod.                                                                          |
| Vitamin B1                                | AOAC 942.23 mod.                                                                          |
| Vitamin B12 - AOAC                        | AOAC 952.20 mod.                                                                          |
| Vitamin B2                                | AOAC 970.65 mod.                                                                          |
| Vitamin B6 -Pyridoxine by HPLC            | J. AOAC 88, 30-37 (2005), mod.                                                            |
| Water Activity                            | AOAC 978.18 mod.                                                                          |

**Table S3.** Estimated mean [95% confidence interval] for blood chemistry of dogs fed diets produced at high, medium and low shear (HS, MS and LS, respectively).

| <b>Parameter</b>     | <b>HS</b>                      | <b>MS</b>                       | <b>LS</b>                      | <b>P</b> | <b>Reference range</b> |
|----------------------|--------------------------------|---------------------------------|--------------------------------|----------|------------------------|
| ALT, U/L             | 24.8 [21.4, 29.4]              | 25.6 [22.0, 30.6]               | 26.8 [22.9, 32.4]              | 0.0822   | 17 – 55                |
| Albumin, g/dL        | 3.34 [3.10, 3.59]              | 3.35 [3.12, 3.59]               | 3.36 [3.13, 3.59]              | 0.9098   | 2.8- 4.0               |
| Alb:Glob             | 1.66 [1.44, 1.88]              | 1.62 [1.40, 1.84]               | 1.64 [1.42, 1.86]              | 0.7102   | 1.1- 2.4               |
| ALP, U/L             | 60.3 [51.7, 68.9]              | 61.0 [52.4, 69.6]               | 55.3 [46.7, 63.9]              | 0.0580   | 17- 134                |
| BUN, mg/dL           | 12.6 <sup>b</sup> [11.0, 14.9] | 12.8 <sup>ab</sup> [11.0, 15.3] | 14.2 <sup>a</sup> [12.1, 17.2] | 0.0284   | 7.6-19.3               |
| BUN:creat            | 14.8 <sup>b</sup> [13.2, 16.6] | 15.0 <sup>b</sup> [13.4, 16.8]  | 16.4 <sup>a</sup> [14.7, 18.4] | 0.0040   | 11.3- 26.4             |
| Creatinine, mg/dL    | 0.864 [0.771, 0.963]           | 0.862 [0.768, 0.962]            | 0.875 [0.786, 0.970]           | 0.4778   | 0.5- 1.0               |
| Calcium, mg/dL       | 9.95 [9.81, 10.08]             | 9.99 [9.86, 10.13]              | 10.02 [9.89, 10.16]            | 0.3718   | 9.0- 10.8              |
| Chloride, mmol/L     | 115.8 [114.8, 116.8]           | 116.4 [115.5, 117.2]            | 116.4 [115.4, 117.5]           | 0.2253   | 108- 116               |
| Cholesterol, mg/dL   | 191.3 [173.9-210.5]            | 191.7 [174.2-210.9]             | 188.7 [171.5-207.6]            | 0.7233   | 127- 318               |
| Globulin, g/dL       | 2.03 [1.83, 2.23]              | 2.06 [1.86, 2.26]               | 2.07 [1.87, 2.27]              | 0.7233   | 1.5- 2.6               |
| Glucose, mg/dL       | 94.0 [90.6, 97.3]              | 93.7 [90.3, 97.0]               | 93.6 [90.2, 96.9]              | 0.9717   | 79- 116                |
| Phosphorous, mg/dL   | 3.42 [3.27, 3.57]              | 3.39 [3.25, 3.54]               | 3.45 [3.31, 3.60]              | 0.8077   | 2.3- 4.7               |
| Magnesium, mg/dL     | 1.83 [1.74, 1.92]              | 1.82 [1.73, 1.92]               | 1.85 [1.76, 1.93]              | 0.7026   | 1.7- 2.2               |
| Potassium, mmol/L    | 4.68 [ 4.59, 4.77]             | 4.67 [4.58, 4.76]               | 4.75 [4.66, 4.83]              | 0.2153   | 3.7- 5.1               |
| Sodium, mmol/L       | 147.5 [145.7, 149.3]           | 147.8 [145.9, 149.6]            | 148.0 [146.2, 149.8]           | 0.2317   | 145- 150               |
| Na:K                 | 31.5 [30.9, 32.2]              | 31.7 [31.0, 32.3]               | 31.2 [30.6, 31.9]              | 0.3068   | 29- 40                 |
| Total protein, g/dL  | 5.43 [5.29, 5.56]              | 5.46 [5.29, 5.64]               | 5.48 [5.33, 5.63]              | 0.5898   | 4.8- 6.1               |
| Triglycerides, mg/dL | 49.7 [39.5, 62.4]              | 50.5 [40.2, 63.5]               | 49.0 [39.0, 61.6]              | 0.8934   | 19- 119                |

<sup>ab</sup> Different letters indicate treatment differences (P < 0.05)

**Table S4.** Estimated mean [95% confidence interval] for complete blood count (CBC) of dogs fed diets produced at high, medium and low shear (HS, MS and LS, respectively).

| Parameter                     | HS                    | MS                    | LS                     | P      | Reference range |
|-------------------------------|-----------------------|-----------------------|------------------------|--------|-----------------|
| IRF, %                        | 15.6 [12.9, 18.4]     | 16.3 [13.5, 19.0]     | 18.0 [15.2, 20.7]      | 0.2455 | 5.2- 32.7       |
| MCH, pg                       | 23.1 [22.8, 23.5]     | 23.1 [22.7, 23.5]     | 23.2 [22.8, 23.6]      | 0.8617 | 21.6- 24.6      |
| MCHC, g/dL                    | 34.8 [34.6, 35.1]     | 34.8 [34.6, 35.1]     | 34.9 [34.7, 35.2]      | 0.4726 | 32.4- 36.0      |
| MCV, fL                       | 66.7 [65.6, 67.37]    | 66.7 [65.6, 67.7]     | 66.6 [65.5, 67.7]      | 0.8014 | 63.6- 72.9      |
| Platelets, k/ $\mu$ L         | 316.0 [269.5, 370.5]  | 309.2 [263.7, 362.5]  | 306.3 [261.2, 359.0]   | 0.4954 | 131- 429        |
| HCT, %                        | 48.1 [46.8, 49.5]     | 47.9 [46.5, 49.3]     | 48.8 [47.4, 50.2]      | 0.2894 | 35.2- 54.2      |
| Red Blood Cells, M/ $\mu$ L   | 7.24 [6.96, 7.53]     | 7.20 [6.92, 7.49]     | 7.35 [7.06, 7.63]      | 0.2690 | 5.16- 8.24      |
| RDW, fL                       | 34.0 [33.2, 34.7]     | 34.0 [33.3, 34.7]     | 33.9 [33.2, 34.6]      | 0.8014 | 31.4- 37.0      |
| HGB, g/dL                     | 16.8 [16.3, 17.2]     | 16.7 [16.2, 17.1]     | 17.0 [16.6, 17.5]      | 0.2197 | 11.9- 18.5      |
| Reticulocytes, %              | 0.695 [0.561, 0.828]  | 0.677 [0.573, 0.781]  | 0.704 [0.555, 0.852]   | 0.9226 | 0.23- 1.30      |
| Basophils, %                  | 0.206 [0.163, 0.250]  | 0.217 [0.172, 0.262]  | 0.214 [0.147, 0.281]   | 0.9185 | -               |
| Eosinophils, %                | 3.41 [2.62, 4.45]     | 3.14 [2.41, 4.10]     | 3.12 [2.39, 4.07]      | 0.4514 | -               |
| Lymphocytes, %                | 30.8 [27.7, 33.9]     | 30.2 [27.1, 33.3]     | 30.0 [26.9, 33.1]      | 0.8562 | -               |
| Monocytes, %                  | 5.07 [4.52, 5.62]     | 4.92 [4.37, 5.47]     | 5.56 [5.01, 6.11]      | 0.0642 | -               |
| Neutrophils, %                | 60.2 [55.4, 65.0]     | 61.1 [56.3, 65.9]     | 60.7 [55.9, 65.5]      | 0.8202 | -               |
| Reticulocytes, M/ $\mu$ L     | 0.065 [0.054, 0.076]  | 0.060 [0.049, 0.071]  | 0.062 [0.052, 0.073]   | 0.4785 | -               |
| Eosinophils, k/ $\mu$ L       | 0.215 [0.141, 0.326]  | 0.198 [0.138, 0.285]  | 0.198 [0.135, 0.292]   | 0.5285 | 0.06- 0.62      |
| Lymphocytes, k/ $\mu$ L       | 1.90 [1.54, 2.26]     | 1.87 [1.47, 2.26]     | 1.88 [1.49, 2.28]      | 0.8059 | 0.87- 3.04      |
| Monocytes, k/ $\mu$ L         | 0.354 [0.303, 0.405]  | 0.346 [0.295, 0.396]  | 0.319 [0.269, 0.370]   | 0.2912 | 0.14- 0.69      |
| Neutrophils, k/ $\mu$ L       | 3.84 [3.45, 4.27]     | 3.86 [3.47, 4.29]     | 3.77 [3.40, 4.19]      | 0.9317 | 2.09- 7.32      |
| Basophils, k/ $\mu$ L         | 0.012 [0.005, 0.0189] | 0.016 [0.009, 0.0226] | 0.013 [0.0053, 0.0198] | 0.7036 | 0.00- 0.04      |
| White Blood Cells, k/ $\mu$ L | 6.65 [5.90, 7.40]     | 6.53 [5.80, 7.26]     | 6.40 [5.66, 7.13]      | 0.7463 | 3.3- 11.3       |

**Table S5.** Estimated mean [95% confidence interval] for fecal minerals of dogs fed diets produced at high, medium and low shear (HS, MS and LS, respectively).

| <b>Fecal mineral</b> | <b>HS</b>                         | <b>MS</b>                          | <b>LS</b>                        | <b>P</b> |
|----------------------|-----------------------------------|------------------------------------|----------------------------------|----------|
| Calcium, %           | 7.58 <sup>ab</sup> [7.01, 8.14]   | 7.17 <sup>b</sup> [6.60, 7.73]     | 8.01 <sup>a</sup> [7.44, 8.57]   | 0.0622   |
| Phosphorous, %       | 4.21 [3.85, 4.57]                 | 4.21 [3.90, 4.53]                  | 4.49 [4.02, 4.95]                | 0.4365   |
| Potassium, %         | 0.362 [0.300, 0.424]              | 0.370 [0.306, 0.434]               | 0.359 [0.296, 0.422]             | 0.9235   |
| Magnesium, %         | 0.537 [0.483, 0.590]              | 0.530 [0.476, 0.583]               | 0.542 [0.488, 0.596]             | 0.9204   |
| Sodium, %            | 0.257 <sup>a</sup> [0.213, 0.310] | 0.208 <sup>ab</sup> [0.172, 0.252] | 0.182 <sup>b</sup> ; 0.154-0.215 | 0.0123   |
| Zinc, ppm            | 2,040 [1,897, 2,183]              | 2,008 [1,865, 2,152]               | 2,160 [2,016, 2,303]             | 0.1934   |
| Copper, ppm          | 99.9 [92.6, 108.5]                | 95.7 [88.9, 103.5]                 | 101.8 [94.2, 110.7]              | 0.3925   |
| Iron, ppm            | 1,226 [1,110, 1,369]              | 1,190 [1,122, 1,266]               | 1,259 [1,181, 1,349]             | 0.4399   |
| Manganese, ppm       | 146.5 [129.0, 164.0]              | 138.8 [125.2, 152.5]               | 160.6 [142.2, 179.0]             | 0.1178   |

<sup>ab</sup>Different letters indicate treatment differences ( $P < 0.05$ ).

**Table S6.** Estimated means ( $\pm$  standard errors) for fecal amino acids concentrations of dogs fed diets produced at high, medium and low shear (HS, MS and LS, respectively).

| Analyte       | HS                               | MS                              | LS                                | P     | q-value |
|---------------|----------------------------------|---------------------------------|-----------------------------------|-------|---------|
| alanine       | -0.134 $\pm$ 0.2106              | 0.016 $\pm$ 0.2106              | -0.091 $\pm$ 0.2216               | 0.612 | 0.518   |
| arginine      | -0.087 $\pm$ 0.5565              | 0.37 $\pm$ 0.5565               | -0.094 $\pm$ 0.5798               | 0.352 | 0.411   |
| asparagine    | 0.358 $\pm$ 0.7919               | 0.982 $\pm$ 0.7919              | 0.588 $\pm$ 0.8262                | 0.494 | 0.477   |
| aspartate     | -0.209 $\pm$ 0.4044              | -0.04 $\pm$ 0.4044              | -0.519 $\pm$ 0.4213               | 0.197 | 0.316   |
| cysteine      | -0.02 $\pm$ 0.1613               | 0.116 $\pm$ 0.1625              | -0.005 $\pm$ 0.1697               | 0.219 | 0.33    |
| glutamate     | -0.420 <sup>b</sup> $\pm$ 0.3304 | 0.055 <sup>a</sup> $\pm$ 0.3307 | -0.269 <sup>ab</sup> $\pm$ 0.3436 | 0.041 | 0.135   |
| glutamine     | 0.073 $\pm$ 0.3285               | 0.213 $\pm$ 0.3289              | 0.217 $\pm$ 0.3434                | 0.717 | 0.56    |
| glycine       | 0.086 <sup>b</sup> $\pm$ 0.2516  | 0.470 <sup>a</sup> $\pm$ 0.2519 | 0.303 <sup>ab</sup> $\pm$ 0.263   | 0.051 | 0.142   |
| histidine     | -0.014 $\pm$ 0.3612              | 0.453 $\pm$ 0.3612              | 0.047 $\pm$ 0.3753                | 0.097 | 0.217   |
| isoleucine    | -0.078 $\pm$ 0.2812              | 0.144 $\pm$ 0.2812              | -0.115 $\pm$ 0.2939               | 0.348 | 0.41    |
| leucine       | -0.164 $\pm$ 0.2832              | 0.05 $\pm$ 0.2832               | -0.177 $\pm$ 0.2962               | 0.428 | 0.44    |
| lysine        | -0.224 $\pm$ 0.2531              | -0.064 $\pm$ 0.2531             | -0.224 $\pm$ 0.2637               | 0.543 | 0.487   |
| methionine    | 0.061 $\pm$ 0.2062               | 0.164 $\pm$ 0.2062              | 0.023 $\pm$ 0.2158                | 0.597 | 0.514   |
| phenylalanine | -0.153 $\pm$ 0.2875              | -0.068 $\pm$ 0.2875             | -0.185 $\pm$ 0.2978               | 0.783 | 0.581   |
| proline       | -0.098 $\pm$ 0.2248              | 0.184 $\pm$ 0.2251              | -0.012 $\pm$ 0.2369               | 0.158 | 0.286   |
| serine        | -0.081 $\pm$ 0.3433              | 0.104 $\pm$ 0.3433              | -0.275 $\pm$ 0.3563               | 0.22  | 0.33    |
| taurine       | 0.004 $\pm$ 0.8388               | -0.264 $\pm$ 0.8388             | -0.056 $\pm$ 0.8522               | 0.707 | 0.558   |
| threonine     | -0.173 <sup>b</sup> $\pm$ 0.2421 | 0.234 <sup>a</sup> $\pm$ 0.2424 | 0.006 <sup>ab</sup> $\pm$ 0.2551  | 0.047 | 0.142   |
| tryptophan    | -0.347 $\pm$ 0.3363              | -0.202 $\pm$ 0.3363             | -0.196 $\pm$ 0.3527               | 0.774 | 0.581   |
| tyrosine      | -0.132 $\pm$ 0.3091              | -0.134 $\pm$ 0.3091             | -0.34 $\pm$ 0.3236                | 0.539 | 0.485   |
| valine        | -0.21 $\pm$ 0.3181               | 0.036 $\pm$ 0.3181              | -0.258 $\pm$ 0.3335               | 0.38  | 0.417   |

<sup>ab</sup>Different letters indicate treatment differences ( $P < 0.05$ ).

**Table S7.** Estimated means (+/- standard errors) for fecal di- and tripeptides metabolomics of dogs fed diets produced at high, medium and low shear (HS, MS and LS, respectively).

| Analyte               | HS                           | MS                           | LS                          | <i>P</i> | q-value |
|-----------------------|------------------------------|------------------------------|-----------------------------|----------|---------|
| ala-ile-ala           | -0.221 ± 0.3322              | 0.175 ± 0.3322               | 0.089 ± 0.3505              | 0.262    | 0.367   |
| ala-leu-ala           | -0.275 ± 0.3328              | 0.142 ± 0.3328               | 0.084 ± 0.3532              | 0.245    | 0.352   |
| alanylleucine         | -0.006 ± 0.2777              | 0.044 ± 0.2777               | 0.177 ± 0.2932              | 0.67     | 0.545   |
| glycylisoleucine      | 0.123 ± 0.3494               | 0.157 ± 0.3469               | -0.052 ± 0.365              | 0.682    | 0.551   |
| glycylleucine         | -0.109 ± 0.2561              | -0.103 ± 0.2546              | -0.082 ± 0.265              | 0.986    | 0.644   |
| glycylvaline          | -0.108 ± 0.2611              | -0.032 ± 0.2611              | -0.104 ± 0.2744             | 0.901    | 0.623   |
| histidylalanine       | 0.136 ± 0.3402               | 0.187 ± 0.3402               | 0.019 ± 0.3578              | 0.786    | 0.582   |
| isoleucylglycine      | 0.259 ± 0.2421               | 0.013 ± 0.2421               | -0.053 ± 0.2516             | 0.111    | 0.230   |
| leucylalanine         | -0.048 ± 0.3119              | 0.046 ± 0.3119               | 0.24 ± 0.3254               | 0.376    | 0.417   |
| leucylglutamine*      | 0.059 ± 0.2949               | 0.302 ± 0.2949               | 0.376 ± 0.3088              | 0.281    | 0.374   |
| leucylglycine         | 0.025 ± 0.2296               | -0.098 ± 0.2296              | 0.073 ± 0.239               | 0.500    | 0.477   |
| lysylleucine          | 0.068 ± 0.2676               | 0.154 ± 0.2676               | 0.188 ± 0.2792              | 0.786    | 0.582   |
| phenylalanylalanine   | -0.045 <sup>b</sup> ± 0.3102 | 0.359 <sup>ab</sup> ± 0.3102 | 0.565 <sup>a</sup> ± 0.3254 | 0.026    | 0.110   |
| phenylalanylglycine   | -0.078 ± 0.2536              | 0.054 ± 0.2536               | 0.134 ± 0.2662              | 0.501    | 0.477   |
| prolylglycine         | -0.322 ± 0.3687              | 0.291 ± 0.3687               | 0.115 ± 0.3903              | 0.101    | 0.218   |
| threonylphenylalanine | -0.241 ± 0.4171              | 0.07 ± 0.4171                | 0.115 ± 0.4317              | 0.306    | 0.393   |
| tryptophylglycine     | 0.012 <sup>b</sup> ± 0.207   | 0.158 <sup>ab</sup> ± 0.207  | 0.364 <sup>a</sup> ± 0.2155 | 0.041    | 0.135   |
| tyrosylglycine        | -0.049 ± 0.2617              | 0.138 ± 0.2617               | 0.12 ± 0.2751               | 0.559    | 0.495   |
| val-val-ala           | -0.064 ± 0.2724              | 0.011 ± 0.2724               | 0.029 ± 0.285               | 0.870    | 0.611   |
| valylglutamine        | -0.036 ± 0.3136              | 0.117 ± 0.312                | 0.074 ± 0.3237              | 0.716    | 0.560   |
| valylglycine          | 0.136 ± 0.1857               | -0.019 ± 0.1846              | 0.02 ± 0.1926               | 0.432    | 0.441   |
| valylleucine          | -0.01 ± 0.2952               | -0.045 ± 0.2952              | 0.004 ± 0.3093              | 0.970    | 0.640   |

<sup>ab</sup>Different letters indicate treatment differences (*P* < 0.05).



**Table S8.** Estimated means (+/- standard errors) for putrefactive compounds metabolomics of dogs fed diets produced at high, medium and low shear (HS, MS and LS, respectively).

| Analyte                        | Estimate HS                   | Estimate MS                  | Estimate LS                   | <i>P</i> | q-value |
|--------------------------------|-------------------------------|------------------------------|-------------------------------|----------|---------|
| 3-indoleglyoxylic acid         | -0.223 <sup>b</sup> ± 0.2357  | -0.201 <sup>b</sup> ± 0.2357 | 0.148 <sup>a</sup> ± 0.2403   | 0.001    | 0.042   |
| 3-hydroxyindolin-2-one         | -0.560 <sup>a</sup> ± 0.3994  | -1.357 <sup>b</sup> ± 0.3994 | -1.279 <sup>b</sup> ± 0.4122  | 0.002    | 0.042   |
| indolepropionate               | -0.283 <sup>b</sup> ± 0.6058  | 0.436 <sup>a</sup> ± 0.6055  | 0.223 <sup>ab</sup> ± 0.6145  | 0.008    | 0.068   |
| indole                         | 0.233 <sup>a</sup> ± 0.4204   | -0.601 <sup>b</sup> ± 0.4204 | -0.434 <sup>b</sup> ± 0.4379  | 0.01     | 0.073   |
| phenol sulfate                 | 0.413 <sup>a</sup> ± 0.6018   | -0.440 <sup>b</sup> ± 0.6018 | -0.264 <sup>ab</sup> ± 0.6158 | 0.014    | 0.087   |
| indolin-2-one                  | 0.450 <sup>a</sup> ± 0.8927   | -0.917 <sup>b</sup> ± 0.8927 | -0.375 <sup>ab</sup> ± 0.9153 | 0.015    | 0.09    |
| 2-hydroxy-3-methylvalerate     | -0.980 <sup>b</sup> ± 0.6032  | 0.201 <sup>a</sup> ± 0.6032  | 0.025 <sup>ab</sup> ± 0.6337  | 0.02     | 0.095   |
| 4-methyl-2-oxopentanoate       | -0.397 <sup>ab</sup> ± 0.4071 | -0.382 <sup>a</sup> ± 0.4071 | -0.975 <sup>b</sup> ± 0.4208  | 0.025    | 0.109   |
| indoleacetyl glycine           | -1.012 <sup>b</sup> ± 0.4675  | -0.323 <sup>a</sup> ± 0.4675 | -0.588 <sup>ab</sup> ± 0.4826 | 0.044    | 0.138   |
| alpha-hydroxyisocaproate       | -1.173 ± 0.7001               | -0.124 ± 0.7001              | -0.198 ± 0.7325               | 0.063    | 0.164   |
| indolelactate                  | -0.278 ± 0.6927               | 1.068 ± 0.6927               | 0.636 ± 0.7386                | 0.068    | 0.17    |
| imidazole lactate              | -0.039 ± 0.5375               | 0.857 ± 0.5375               | 0.454 ± 0.5643                | 0.077    | 0.185   |
| alpha-hydroxyisovalerate       | -1.244 ± 0.606                | -0.414 ± 0.606               | -0.415 ± 0.6343               | 0.085    | 0.197   |
| 5-hydroxyindoleacetate         | -0.195 ± 0.3977               | -0.47 ± 0.3977               | -0.528 ± 0.4045               | 0.111    | 0.23    |
| phenyllactate (PLA)            | 0.051 ± 0.543                 | 0.825 ± 0.543                | 0.602 ± 0.5684                | 0.118    | 0.24    |
| 4-hydroxyphenylpyruvate        | 0.022 ± 0.4193                | 0.072 ± 0.4193               | -0.59 ± 0.4507                | 0.149    | 0.273   |
| 3-methyl-2-oxovalerate         | -0.523 ± 0.4792               | -0.473 ± 0.4792              | -0.937 ± 0.4949               | 0.196    | 0.316   |
| indoleacetate                  | -0.027 ± 0.1846               | -0.047 ± 0.1845              | -0.219 ± 0.1923               | 0.272    | 0.369   |
| indoleacrylate                 | -0.175 ± 0.3578               | -0.347 ± 0.3578              | -0.502 ± 0.3694               | 0.292    | 0.38    |
| 3-methyl-2-oxobutyrate         | -0.486 ± 0.3857               | -0.494 ± 0.3857              | -0.764 ± 0.3975               | 0.346    | 0.409   |
| phenylpyruvate                 | -0.131 ± 0.3602               | -0.117 ± 0.3602              | -0.431 ± 0.3771               | 0.372    | 0.417   |
| 3-formylindole                 | -0.266 ± 0.1975               | -0.235 ± 0.1978              | -0.391 ± 0.2088               | 0.443    | 0.449   |
| 3-(4-hydroxyphenyl) propionate | -0.078 ± 0.4893               | 0.127 ± 0.4896               | 0.007 ± 0.4989                | 0.614    | 0.519   |
| indole-3-carboxylate           | -0.251 ± 0.3334               | -0.413 ± 0.3334              | -0.396 ± 0.3499               | 0.758    | 0.578   |
| 2-oxindole-3-acetate           | 0.065 ± 0.2847                | -0.028 ± 0.2847              | 0.082 ± 0.2937                | 0.768    | 0.58    |

|                        |                |                |                |       |       |
|------------------------|----------------|----------------|----------------|-------|-------|
| 4-hydroxyphenylacetate | 0.116 ± 0.2998 | 0.229 ± 0.2998 | 0.133 ± 0.3101 | 0.791 | 0.583 |
| phenylacetate          | 0.255 ± 0.5457 | 0.278 ± 0.5457 | 0.347 ± 0.5647 | 0.958 | 0.637 |

<sup>ab</sup>Different letters indicate treatment differences ( $P < 0.05$ ).

**Table S9.** Fecal advanced glycation end-products (AGEs) Metabolomics of Dogs (N=24) fed Diets produced at High, Medium and Low Shear (HS, MS and LS, respectively).

| Analyte                 | Estimate HS                  | Estimate MS                 | Estimate LS                | <i>P</i> | q-value |
|-------------------------|------------------------------|-----------------------------|----------------------------|----------|---------|
| carboxy-methyl-arginine | -0.810 ± 0.423               | -0.811 ± 0.423              | -0.559 ± 0.4309            | 0.298    | 0.384   |
| N6-carboxyethyllysine   | -0.245 ± 0.265               | -0.219 ± 0.265              | -0.06 ± 0.2713             | 0.31     | 0.394   |
| N6-carboxymethyllysine  | -0.267 ± 0.2084              | -0.524 ± 0.2087             | -0.488 ± 0.2193            | 0.137    | 0.261   |
| pyrraline               | -0.109 <sup>b</sup> ± 0.2966 | 0.380 <sup>a</sup> ± 0.2966 | 0.478 <sup>a</sup> ± 0.305 | 0.001    | 0.042   |

<sup>ab</sup>Different letters indicate treatment differences ( $P < 0.05$ ).
